# Supplementary material for: Comparison of Six Commercial Diagnostic Tests for the Detection of Dengue Virus Non-Structural-1 Antigen and IgM/IgG Antibodies
Source: PubMed Central journal article supplement — Ann Lab Med. 2019 Jun 25;39(6):566–71. doi: 10.3343/alm.2019.39.6.566 (PMC6660329; doi:10.3343/alm.2019.39.6.566), 2019-06-25
Supplement: alm-39-566-s001.pdf [file alm-39-566-s001.pdf]

**Supplemental Data Table S1.** NS1 antigen, IgM, IgG, and PCR reference results of all clinical samples

| No. case | Subject type | NS1 antigen | DENV IgM | DENV IgG | DENV PCR |
|----------|--------------|-------------|----------|----------|----------|
| 1        | Confirmed    | N           | N        | P        | NA       |
| 2        | Confirmed    | N           | P        | P        | NA       |
| 3        | Confirmed    | N           | P        | P        | NA       |
| 4        | Confirmed    | N           | P        | P        | NA       |
| 5        | Confirmed    | N           | P        | P        | NA       |
| 6        | Confirmed    | N           | P        | P        | NA       |
| 7        | Confirmed    | N           | P        | P        | NA       |
| 8        | Confirmed    | N           | P        | P        | NA       |
| 9        | Confirmed    | N           | P        | P        | NA       |
| 10       | Confirmed    | P           | P        | P        | NA       |
| 11       | Confirmed    | N           | P        | P        | NA       |
| 12       | Confirmed    | N           | P        | P        | NA       |
| 13       | Confirmed    | N           | P        | P        | NA       |
| 14       | Confirmed    | N           | P        | P        | NA       |
| 15       | Confirmed    | N           | P        | P        | NA       |
| 16       | Confirmed    | N           | P        | P        | NA       |
| 17       | Confirmed    | N           | P        | P        | NA       |
| 18       | Confirmed    | N           | P        | P        | NA       |
| 19       | Confirmed    | N           | P        | P        | NA       |
| 20       | Confirmed    | N           | P        | P        | NA       |
| 21       | Confirmed    | N           | P        | P        | NA       |
| 22       | Confirmed    | P           | P        | P        | NA       |
| 23       | Confirmed    | N           | P        | P        | NA       |
| 24       | Confirmed    | N           | P        | P        | NA       |
| 25       | Confirmed    | N           | P        | P        | NA       |
| 26       | Confirmed    | N           | P        | P        | NA       |
| 27       | Confirmed    | N           | P        | P        | NA       |
| 28       | Confirmed    | N           | P        | P        | NA       |
| 29       | Confirmed    | N           | N        | P        | NA       |
| 30       | Confirmed    | N           | P        | P        | NA       |
| 31       | Confirmed    | N           | P        | P        | NA       |
| 32       | Confirmed    | N           | P        | P        | NA       |
| 33       | Confirmed    | N           | P        | P        | NA       |
| 34       | Confirmed    | N           | P        | P        | NA       |
| 35       | Confirmed    | N           | P        | P        | NA       |
| 36       | Confirmed    | N           | P        | P        | NA       |
| 37       | Confirmed    | N           | P        | P        | NA       |
| 38       | Confirmed    | N           | P        | P        | NA       |
| 39       | Confirmed    | N           | P        | P        | NA       |
| 40       | Confirmed    | N           | P        | P        | NA       |

(Continued to the next)

**Supplemental Data Table S1.** Continued

| No. case | Subject type | NS1 antigen | DENV IgM | DENV IgG | DENV PCR |
|----------|--------------|-------------|----------|----------|----------|
| 41       | Confirmed    | N           | P        | P        | NA       |
| 42       | Confirmed    | N           | P        | P        | NA       |
| 43       | Confirmed    | N           | P        | P        | NA       |
| 44       | Confirmed    | N           | P        | P        | NA       |
| 45       | Confirmed    | N           | P        | P        | NA       |
| 46       | Confirmed    | N           | P        | P        | NA       |
| 47       | Confirmed    | N           | P        | P        | NA       |
| 48       | Confirmed    | N           | P        | P        | NA       |
| 49       | Confirmed    | N           | N        | P        | NA       |
| 50       | Confirmed    | N           | P        | P        | NA       |
| 51       | Confirmed    | N           | P        | P        | NA       |
| 52       | Confirmed    | N           | P        | P        | NA       |
| 53       | Confirmed    | N           | P        | P        | NA       |
| 54       | Confirmed    | N           | P        | P        | NA       |
| 55       | Confirmed    | N           | N        | P        | NA       |
| 56       | Confirmed    | N           | P        | P        | NA       |
| 57       | Confirmed    | N           | N        | P        | NA       |
| 58       | Confirmed    | N           | P        | P        | NA       |
| 59       | Confirmed    | N           | P        | P        | NA       |
| 60       | Confirmed    | N           | P        | P        | NA       |
| 61       | Suspect      | N           | N        | N        | N        |
| 62       | Suspect      | N           | N        | N        | N        |
| 63       | Suspect      | N           | N        | N        | N        |
| 64       | Suspect      | P           | N        | N        | P        |
| 65       | Suspect      | N           | N        | N        | N        |
| 66       | Suspect      | N           | N        | N        | N        |
| 67       | Suspect      | N           | N        | N        | N        |
| 68       | Suspect      | N           | N        | N        | N        |
| 69       | Suspect      | P           | P        | P        | N        |
| 70       | Suspect      | P           | P        | N        | N        |
| 71       | Suspect      | N           | N        | P        | N        |
| 72       | Suspect      | P           | N        | P        | P        |
| 73       | Suspect      | P           | N        | N        | N        |
| 74       | Suspect      | P           | P        | P        | P        |
| 75       | Suspect      | N           | N        | N        | N        |
| 76       | Suspect      | P           | N        | N        | N        |
| 77       | Suspect      | P           | N        | N        | P        |
| 78       | Suspect      | N           | N        | N        | N        |
| 79       | Suspect      | N           | P        | P        | N        |
| 80       | Suspect      | P           | P        | P        | N        |

(Continued to the next page)

Supplemental Data Table S1. Continued

| No. case | Subject type | NS1 antigen | DENV IgM | DENV IgG | DENV PCR |
|----------|--------------|-------------|----------|----------|----------|
| 81       | Suspect      | N           | N        | N        | N        |
| 82       | Suspect      | N           | N        | P        | N        |
| 83       | Suspect      | P           | P        | P        | N        |
| 84       | Suspect      | N           | N        | N        | N        |
| 85       | Suspect      | N           | N        | N        | N        |
| 86       | Suspect      | N           | N        | N        | N        |
| 87       | Suspect      | P           | P        | P        | N        |
| 88       | Suspect      | N           | N        | N        | N        |
| 89       | Suspect      | N           | N        | N        | N        |
| 90       | Suspect      | N           | N        | N        | N        |
| 91       | Suspect      | N           | N        | N        | N        |
| 92       | Suspect      | N           | N        | N        | N        |
| 93       | Suspect      | N           | N        | N        | N        |
| 94       | Suspect      | P           | P        | P        | N        |
| 95       | Healthy      | N           | N        | N        | NA       |
| 96       | Healthy      | N           | N        | N        | NA       |
| 97       | Healthy      | N           | N        | N        | NA       |
| 98       | Healthy      | N           | N        | N        | NA       |
| 99       | Healthy      | N           | N        | N        | NA       |
| 100      | Healthy      | N           | N        | N        | NA       |
| 101      | Healthy      | N           | N        | N        | NA       |
| 102      | Healthy      | N           | N        | N        | NA       |
| 103      | Healthy      | N           | N        | N        | NA       |
| 104      | Healthy      | N           | N        | N        | NA       |
| 105      | Healthy      | N           | N        | N        | NA       |
| 106      | Healthy      | N           | N        | N        | NA       |
| 107      | Healthy      | N           | N        | N        | NA       |
| 108      | Healthy      | N           | N        | N        | NA       |
| 109      | Healthy      | N           | N        | N        | NA       |
| 110      | Healthy      | N           | N        | N        | NA       |
| 111      | Healthy      | N           | N        | N        | NA       |
| 112      | Healthy      | N           | N        | N        | NA       |
| 113      | Healthy      | N           | N        | N        | NA       |
| 114      | Healthy      | N           | N        | N        | NA       |
| 115      | Healthy      | N           | N        | N        | NA       |
| 116      | Healthy      | N           | N        | N        | NA       |
| 117      | Healthy      | N           | N        | N        | NA       |
| 118      | Healthy      | N           | N        | N        | NA       |
| 119      | Healthy      | N           | N        | N        | NA       |
| 120      | Healthy      | N           | N        | N        | NA       |

(Continued to the next)

Supplemental Data Table S1. Continued

| No. case | Subject type | NS1 antigen | DENV IgM | DENV IgG | DENV PCR |
|----------|--------------|-------------|----------|----------|----------|
| 121      | Healthy      | N           | N        | N        | NA       |
| 122      | Healthy      | N           | N        | N        | NA       |
| 123      | Healthy      | N           | N        | N        | NA       |
| 124      | Healthy      | N           | N        | N        | NA       |
| 125      | Healthy      | N           | N        | N        | NA       |
| 126      | Healthy      | N           | N        | N        | NA       |
| 127      | Healthy      | N           | N        | N        | NA       |
| 128      | Healthy      | N           | N        | N        | NA       |
| 129      | Healthy      | N           | N        | N        | NA       |
| 130      | Healthy      | N           | N        | N        | NA       |
| 131      | Healthy      | N           | N        | N        | NA       |
| 132      | Healthy      | N           | N        | N        | NA       |
| 133      | Healthy      | N           | N        | N        | NA       |
| 134      | Healthy      | N           | N        | N        | NA       |
| 135      | Healthy      | N           | N        | N        | NA       |
| 136      | Healthy      | N           | N        | N        | NA       |
| 137      | Healthy      | N           | N        | N        | NA       |
| 138      | Healthy      | N           | N        | N        | NA       |

Abbreviations: DENV, dengue virus; NS1, non-structural-1; P, positive; N, negative; NA, not available; Confirmed, samples from patients with confirmed infection; Suspect, samples from Korean patients suspected for infection; Healthy, control samples from healthy subjects.
