# Supplementary material for: Comparison of Six Commercial Diagnostic Tests for the Detection of Dengue Virus Non-Structural-1 Antigen and IgM/IgG Antibodies
Source: PubMed Central journal article supplement — Ann Lab Med. 2019 Jun 25;39(6):566–71. doi: 10.3343/alm.2019.39.6.566 (PMC6660329; doi:10.3343/alm.2019.39.6.566), 2019-06-25
Supplement: alm-39-566-s002.pdf [file alm-39-566-s002.pdf]

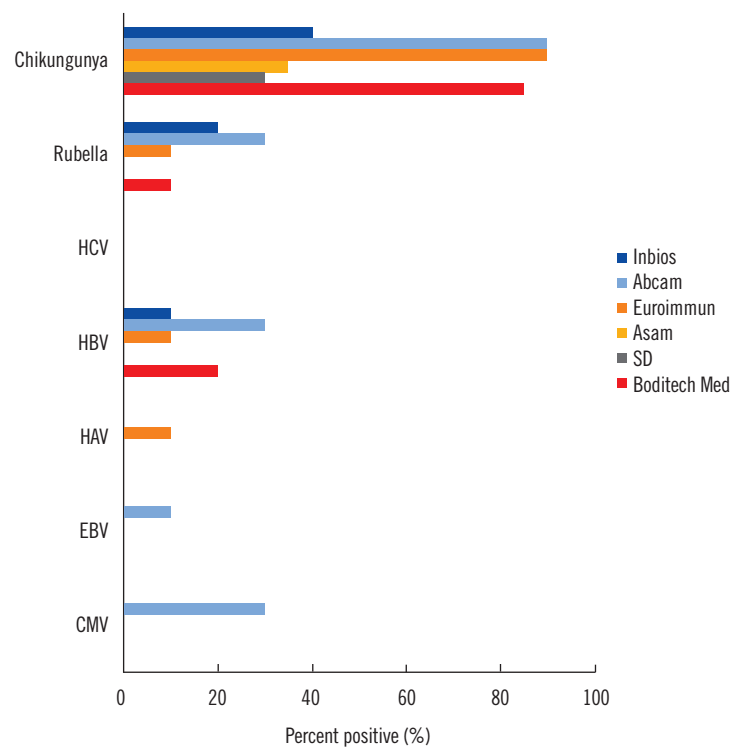

**Supplemental Data Fig. S1.** False positive rate of six DENV IgG tests for samples with IgG against other viruses; DENV Detect IgG ELISA (InBios International, Inc., Seattle, WA, USA); Anti-Dengue virus IgG Human ELISA (Abcam, Cambridge, MA, USA); Anti-Dengue virus ELISA (IgG) (Euroimmun, Lübeck, Germany); Asan Easy Test Dengue IgG/IgM (Asan Pharm, Seoul, Korea); SD BIOLINE Dengue Duo (Standard Diagnostics Inc., Seoul, Korea); Ichroma Dengue IgG/IgM (Boditech Med, Chuncheon, Korea).

Abbreviations: EBV, Epstein–Barr virus; DENV, dengue virus; CMV, cytomegalovirus; HAV, hepatitis A virus; HBV, hepatitis B virus; HCV, hepatitis C virus.
